# Supplementary material for: Droplet-based fluorescence anisotropy insulin immunoassay
Source: Royal Society of Chemistry journal article supplement (doi:10.1039/d4ay01511h), 2024-01-01
Supplement: d4ay01511h1.pdf [file d4ay01511h1.pdf]

Supplementary Information for:

Droplet-based fluorescence anisotropy insulin immunoassay

Damilola I. Adeoye<sup>1\*</sup>, Rafael A. Masitas<sup>1\*</sup>, James Thornham<sup>2</sup>, Xiangyue Meng<sup>1</sup>, Daniel  
J. Steyer<sup>1</sup>, and Michael G. Roper<sup>#,1,2</sup>

<sup>1</sup>Department of Chemistry & Biochemistry, Florida State University

<sup>2</sup>Program in Molecular Biophysics, Florida State University

\*Authors contributed equally

Analyzed droplet data and reproducibility are shown.

Corresponding author:

Michael G. Roper

Department of Chemistry and Biochemistry

Florida State University

95 Chieftain Way

Tallahassee, FL 32306, USA

mroper@fsu.edu

850-644-1846

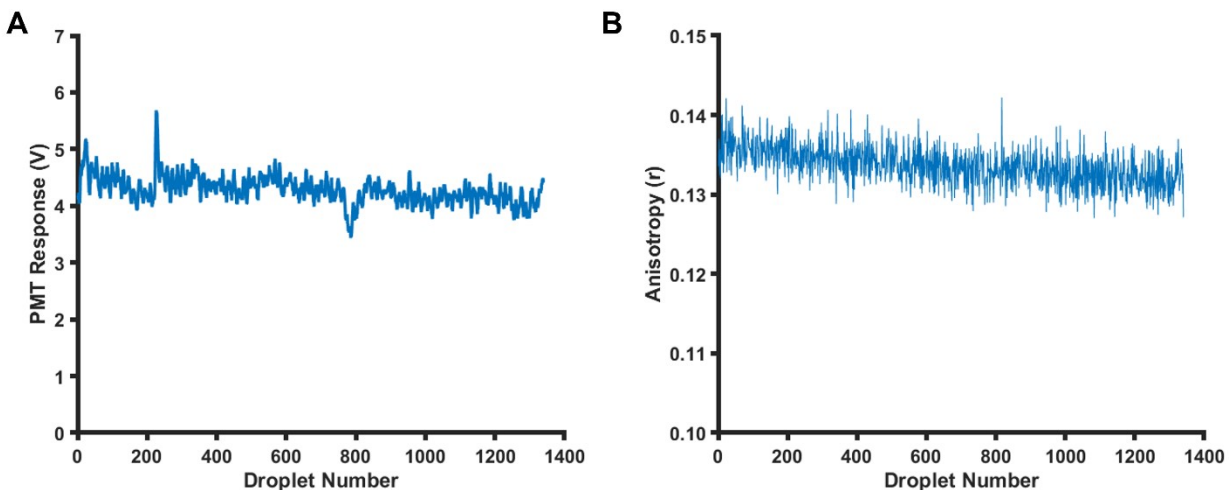

**Figure S-1. Representative droplet data.** The data from PMT1 in Figure 2 is shown. **A.** The data within 0.1 V of the maximum from each droplet were averaged and plotted as a function of droplet number. **B.** The average intensity per droplet from both PMTs were used to calculate the average anisotropy per droplet using equation 1.

**Table S-1.** Reproducibility of responses.

| <b>[Insulin]<br/>(nM)</b> | <b>Avg FA</b> | <b>%RSD FA<br/>(%)</b> | <b>Avg<br/>fluorescence<br/>intensity<sup>a</sup><br/>(V)</b> | <b>%RSD<br/>fluorescence<br/>intensity<sup>a</sup><br/>(%)</b> |
|---------------------------|---------------|------------------------|---------------------------------------------------------------|----------------------------------------------------------------|
| 0                         | 0.1872        | 1.8                    | 5.08                                                          | 4.7                                                            |
| 50                        | 0.1337        | 1.8                    | 4.28                                                          | 5.8                                                            |
| 100                       | 0.1262        | 1.5                    | 3.96                                                          | 4.6                                                            |
| 200                       | 0.1211        | 1.6                    | 4.83                                                          | 5.0                                                            |
| 500                       | 0.1184        | 1.5                    | 3.91                                                          | 6.1                                                            |

<sup>a</sup>Calculated from PMT 1.
